# Supplementary material for: Effect of molar mass and alkyl chain length on the surface properties and biocompatibility of poly(alkylene terephthalate)s for potential cardiovascular applications
Source: Royal Society of Chemistry journal article supplement (doi:10.1039/d3tb01889j), 2023-01-01
Supplement: d3tb01889j1.pdf [file d3tb01889j1.pdf]

## Effect of molar mass and alkyl chain length on the surface properties and biocompatibility of poly(alkylene terephthalate)s for potential cardiovascular applications

Lenny Van Daele<sup>a,○</sup>, Babs Van de Voorde<sup>a,○</sup>, Robin Colenbier<sup>a,b</sup>, Lobke De Vos<sup>a</sup>, Laurens Parmentier<sup>a</sup>, Louis Van der Meeren<sup>c</sup>, André Skirtach<sup>c</sup>, Ruslan I. Dmitriev<sup>b</sup>, Peter Dubruel<sup>a,\*</sup>, Sandra Van Vlierberghe<sup>a,\*</sup>

<sup>a</sup> Polymer Chemistry and Biomaterials Group (PBM), Centre of Macromolecular Chemistry (CMaC), Department of Organic and Macromolecular Chemistry, Ghent University, Krijgslaan 281 S4, 9000 Ghent, Belgium

<sup>b</sup> Tissue engineering and Biomaterials Group, Department of Human structure and repair, Faculty of Medicine and Health Sciences, Ghent University, C. Heymanslaan 10, 6B3, UZP123, 9000 Ghent, Belgium

<sup>c</sup> Department of Biotechnology, Ghent University, Proeftuinstraat 86, 9000 Ghent, Belgium

<sup>○</sup> Both authors contributed equally to the manuscript

\* [Sandra.VanVlierberghe@UGent.be](mailto:Sandra.VanVlierberghe@UGent.be), [Peter.Dubruel@UGent.be](mailto:Peter.Dubruel@UGent.be)

Table S1: Weight-average molar mass and polydispersity index of all used polymers.

| Polymer                 | M <sub>w</sub> (kg/mol) | PDI |
|-------------------------|-------------------------|-----|
| PAT <sub>(n = 8)</sub>  | 131                     | 1.5 |
| PAT <sub>(n = 9)</sub>  | 28                      | 1.1 |
| PAT <sub>(n = 9)</sub>  | 62                      | 1.5 |
| PAT <sub>(n = 9)</sub>  | 116                     | 1.6 |
| PAT <sub>(n = 9)</sub>  | 168                     | 1.5 |
| PAT <sub>(n = 9)</sub>  | 206                     | 1.5 |
| PAT <sub>(n = 10)</sub> | 119                     | 1.5 |
| PAT <sub>(n = 11)</sub> | 162                     | 1.8 |
| PAT <sub>(n = 12)</sub> | 119                     | 1.8 |
